# Supplementary material
Source: HighWire-hosted journal article supplement (https://cmajopen-stage.highwire.org/highwire/filestream/90357/field_highwire_adjunct_files/2/open-2022-0198-3-at.pdf)
Supplement: open-2022-0198-3-at.pdf [file open-2022-0198-3-at.pdf]

## APPENDIX 3

### First invitation sent from Survey Monkey:

Subject line: Patient/Public Involvement in Your Randomized Controlled Trial

Dear Dr. [LastName]

I am writing to you on behalf of a team of researchers from the Ottawa Hospital Research Institute, the University of Toronto, Université catholique de Louvain, and the University of Aberdeen who are conducting a survey on the involvement of patients and the public in randomized controlled trials.

We are particularly interested in finding out more about *your trial*: [CustomData1], published in [CustomData2] in [CustomData3].

You were selected for the survey as you are the corresponding author for this trial. We estimate that the survey will take approximately **5 to 10 minutes** to complete. Even if you did not partner with patients or members of the public in your trial, we would still like to hear from you. You may invite another research team member involved in the trial to complete the survey if necessary, by forwarding this message to them.

Our goal is to understand how often trialists involve patients and members of the public in their research, and if so, what methods were used, who was involved, and why they chose to do so.

Participation in this survey is voluntary. If you choose to participate, you will be entered into a random draw for **one of five \$100 CAD Amazon gift cards**. Thank you for considering our request.

**If you would like to participate, please click on the button below which will take you to the participant information sheet and consent form.**

Dr. Shelley Vanderhout on behalf of the research team:

Dr. Jamie Brehaut, Ottawa Hospital Research Institute

Dr. Dean Fergusson, Ottawa Hospital Research Institute

Dr. Kate Gillies, University of Aberdeen

Dr. Beatriz Goulao, University of Aberdeen

Dr. Colin Macarthur, University of Toronto

Dr. Stuart Nicholls, Ottawa Hospital Research Institute

Dr. Beth Potter, University of Ottawa

Dr. Anne Spinewine, Université catholique de Louvain and Ottawa Hospital Research Institute

Dr. Monica Taljaard, Ottawa Hospital Research Institute



## First reminder sent from Survey Monkey

Subject line: Patient and public involvement survey: Thank you/Reminder

Dear [FirstName] [LastName]

Approximately two weeks ago, we invited you to complete our survey about patient and public involvement in your randomized trial: [CustomData1], published in [CustomData2], [CustomData3]. You were selected for the survey as you are the corresponding author for this trial. If you have already completed and submitted the survey, please accept our sincere thanks. If not and you would still like to participate, we would appreciate you doing so. Even if you did not partner with patients or members of the public in your trial, we would still like to hear from you.

We estimate that the survey will take approximately **5-10 minutes** to complete. You may invite another research team member involved in the trial to complete the survey if necessary, by forwarding this message to them.

Participation in this survey is voluntary. If you choose to participate, you will be entered into a random draw for **one of five \$100 CAD Amazon** gift cards. Thank you for considering our request.

If you would like to participate, please click on the button below which will take you to the participant information sheet and consent form.

Dr. Shelley Vanderhout on behalf of the research team:

Dr. Jamie Brehaut, Ottawa Hospital Research Institute

Dr. Dean Fergusson, Ottawa Hospital Research Institute

Dr. Kate Gillies, University of Aberdeen

Dr. Beatriz Goulao, University of Aberdeen

Dr. Colin Macarthur, University of Toronto

Dr. Stuart Nicholls, Ottawa Hospital Research Institute

Dr. Beth Potter, University of Ottawa

Dr. Anne Spinewine, Université catholique de Louvain and Ottawa Hospital Research Institute

Dr. Monica Taljaard, Ottawa Hospital Research Institute

## Second reminder sent from Survey Monkey:

Subject line: Patient and public involvement survey: Thank you/Reminder

Dear [FirstName] [LastName]

Approximately three weeks ago, we invited you to complete a survey about patient and public involvement in your randomized trial: [CustomData1], published in [CustomData2], [CustomData3]. You were selected for the survey as you are the corresponding author for this trial. If you have already completed and submitted the survey, please accept our sincere thanks. If not and you would still like to participate, we would appreciate you doing so. Even if you did not partner with patients or members of the public in your trial, we would still like to hear from you.

We estimate that the survey will take approximately **5-10 minutes** to complete. You may invite another research team member involved in the trial to complete the survey if necessary, by forwarding this message to them.

Participation in this survey is voluntary. If you choose to participate, you will be entered into a random draw for **one of five \$100 CAD Amazon** gift cards. Thank you for considering our request.

If you would like to participate, please click on the button below which will take you to the participant information sheet and consent form.

Dr. Shelley Vanderhout on behalf of the research team:

Dr. Jamie Brehaut, Ottawa Hospital Research Institute

Dr. Dean Fergusson, Ottawa Hospital Research Institute

Dr. Kate Gillies, University of Aberdeen

Dr. Beatriz Goulao, University of Aberdeen

Dr. Colin Macarthur, University of Toronto

Dr. Stuart Nicholls, Ottawa Hospital Research Institute

Dr. Beth Potter, University of Ottawa

Dr. Anne Spinewine, Université catholique de Louvain and Ottawa Hospital Research Institute

Dr. Monica Taljaard, Ottawa Hospital Research Institute

## Final Reminder sent from an institutional email address

Subject line: Patient and public involvement survey: Final reminder/Thank you

Dear [FirstName] [LastName]

Approximately five weeks ago, we invited you to complete a survey about patient and public involvement in your randomized trial: [CustomData1], published in [CustomData2], [CustomData3]. You were selected for the survey as you are the corresponding author for this trial. If you have already completed and submitted the survey, please accept our sincere thanks. If not and you would still like to participate, we would appreciate you doing so. Even if you did not partner with patients or members of the public in your trial, we would still like to hear from you.

We estimate that the survey will take approximately **5-10 minutes** to complete. You may invite another research team member involved in the trial to complete the survey if necessary, by forwarding this message to them.

Participation in this survey is voluntary. If you choose to participate, you will be entered into a random draw for **one of five \$100 CAD Amazon** gift cards. Thank you for considering our request.

If you would like to participate, please click on the button below which will take you to the participant information sheet and consent form.

To access the survey, please enter the following **4-digit ID number** for your trial in Question 1:  
**XXXX**

Thank you for considering our request.

Kelly Carroll on behalf of the research team:

Dr. Monica Taljaard, Ottawa Hospital Research Institute

Dr. Jamie Brehaut, Ottawa Hospital Research Institute

Dr. Dean Fergusson, Ottawa Hospital Research Institute

Dr. Kate Gillies, University of Aberdeen

Dr. Beatriz Goulao, University of Aberdeen

Dr. Colin Macarthur, University of Toronto

Dr. Stuart Nicholls, Ottawa Hospital Research Institute

Dr. Beth Potter, University of Ottawa

Dr. Anne Spinewine, Université catholique de Louvain and Ottawa Hospital Research Institute

Dr. Shelley Vanderhout, University of Ottawa

Appendix 3, as supplied by the authors. Appendix to: Vanderhout S, Nevins P, Nicholls SG, et al. Patient and public involvement in pragmatic trials: online survey of corresponding authors of published trials. *CMAJ Open* 2023. doi: 10.9778/cmajo.20220198. Copyright © 2023 The Author(s) or their employer(s). To receive this resource in an accessible format, please contact us at [cmajgroup@cmaj.ca](mailto:cmajgroup@cmaj.ca).

Version Date January 11 2022
